# Supplementary material
Source: PubMed Central journal article supplement (PMC6118642)
Supplement: jci-128-120549-s286.pdf [file jci-128-120549-s286.pdf]

■ On-ART    ● Viral load  
 □ Off-ART    ■ CD4 count

## Early-treated participants

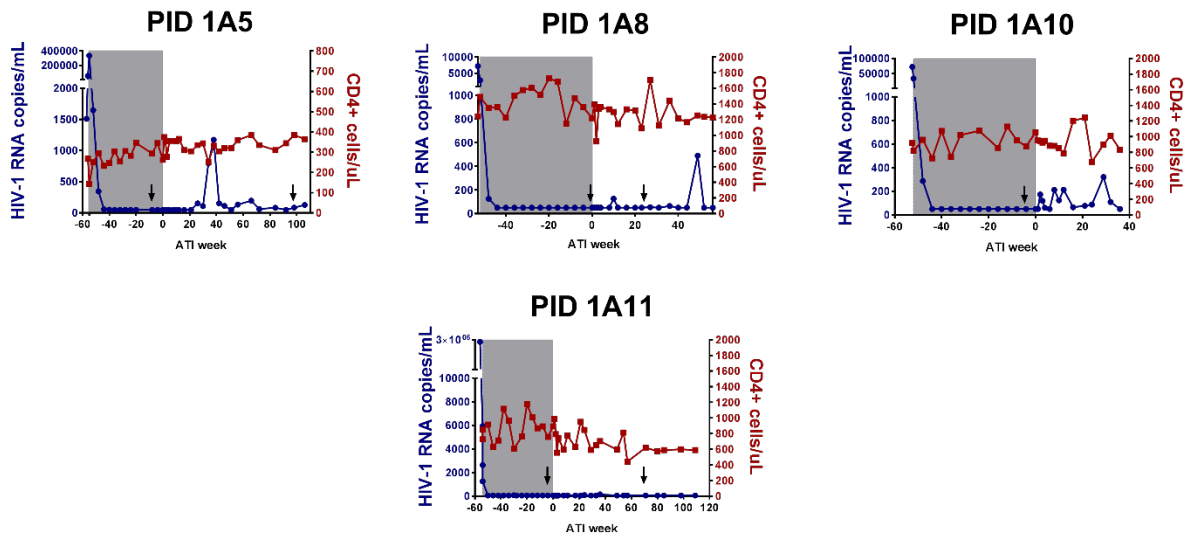

## Chronic-treated participants

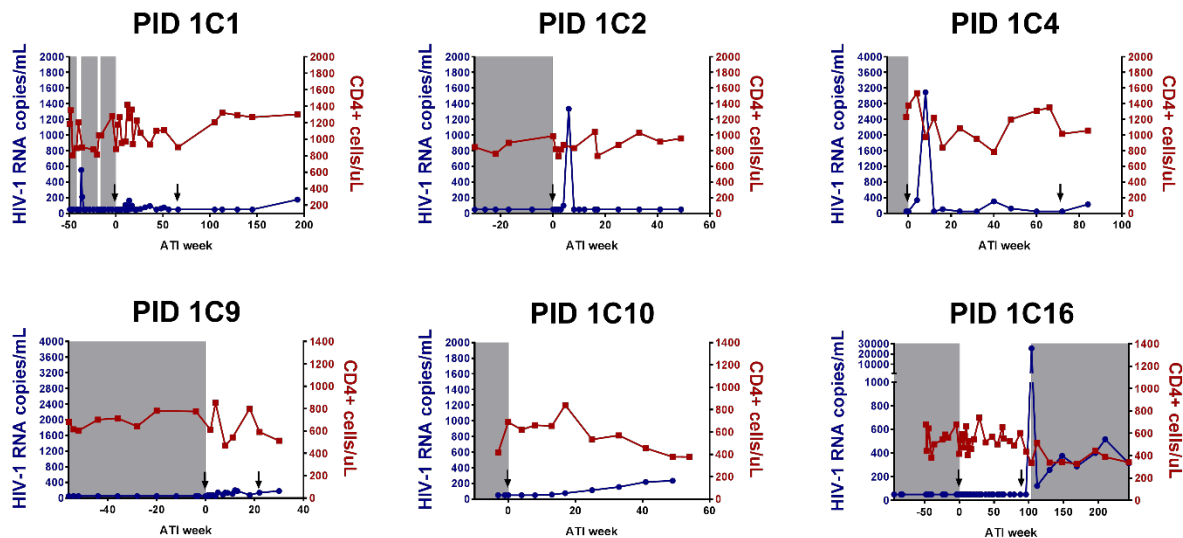

**Figure S1. Viral loads and CD4 counts for PTCs.**

For each of the PTCs, viral loads are graphed in blue and CD4 counts in red. Black arrows represent time points used for proviral genome sequencing at either the pre-ATI or the post-ATI timepoint. On-ART period is shaded in grey and the off-ART period shown as white.

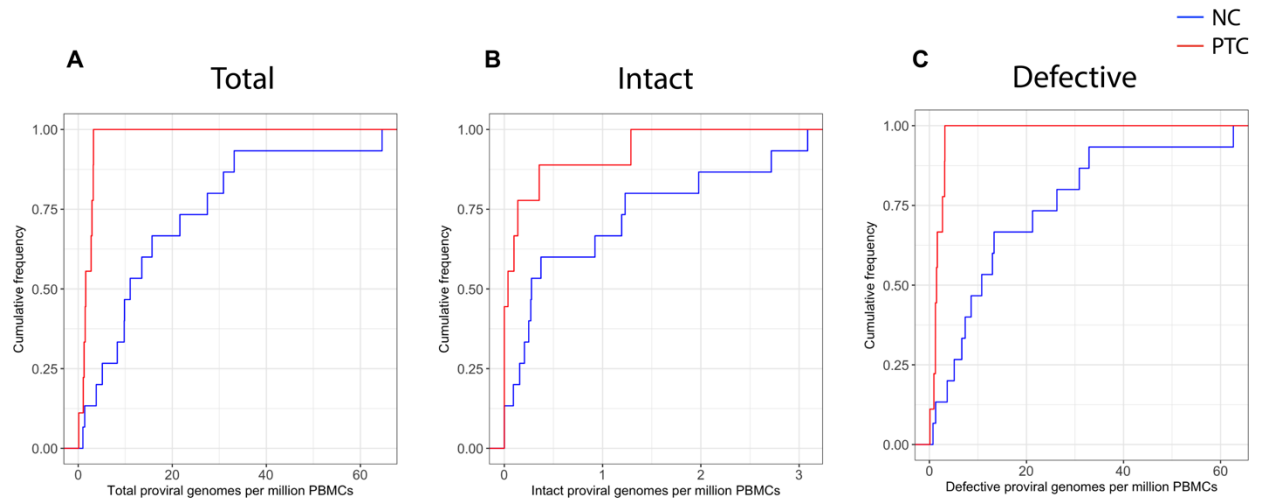

**Figure S2. Cumulative frequency plots.** Cumulative plots of the copy numbers of total (A), intact (B) and defective (C) proviruses are shown.

878

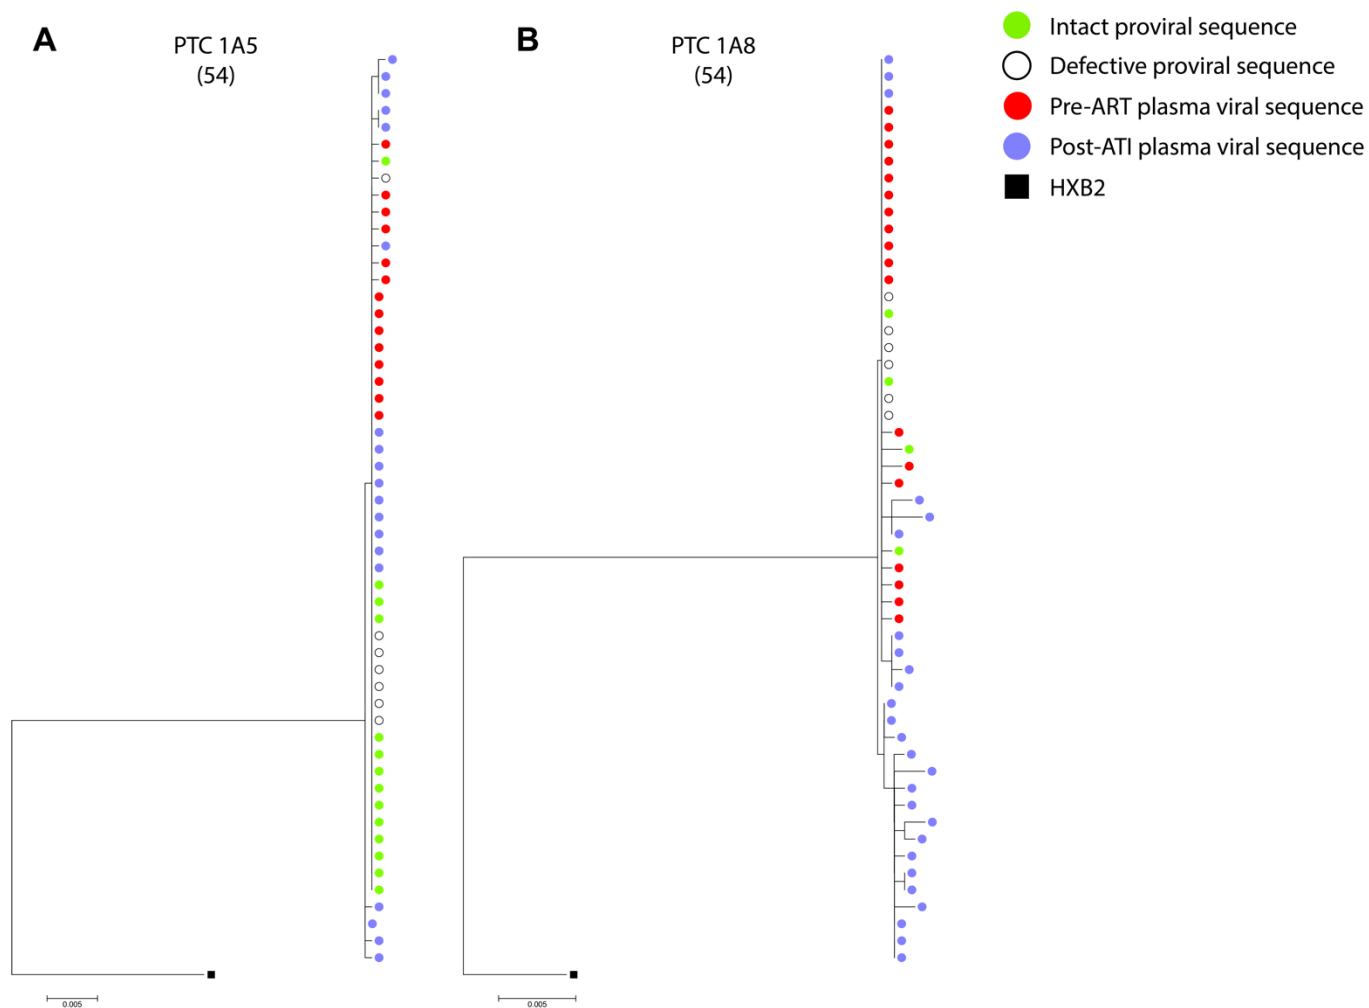

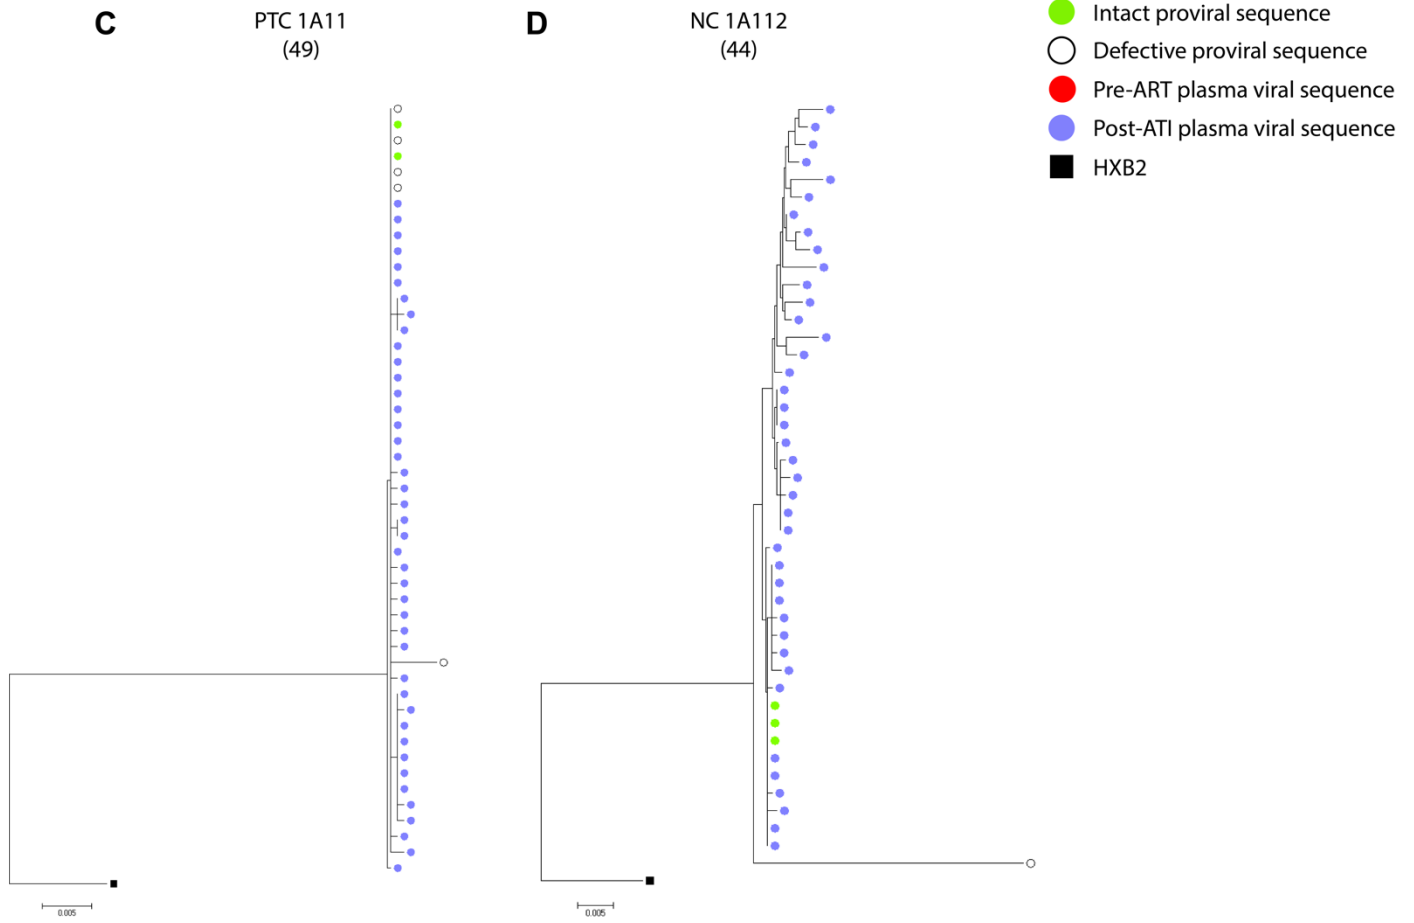

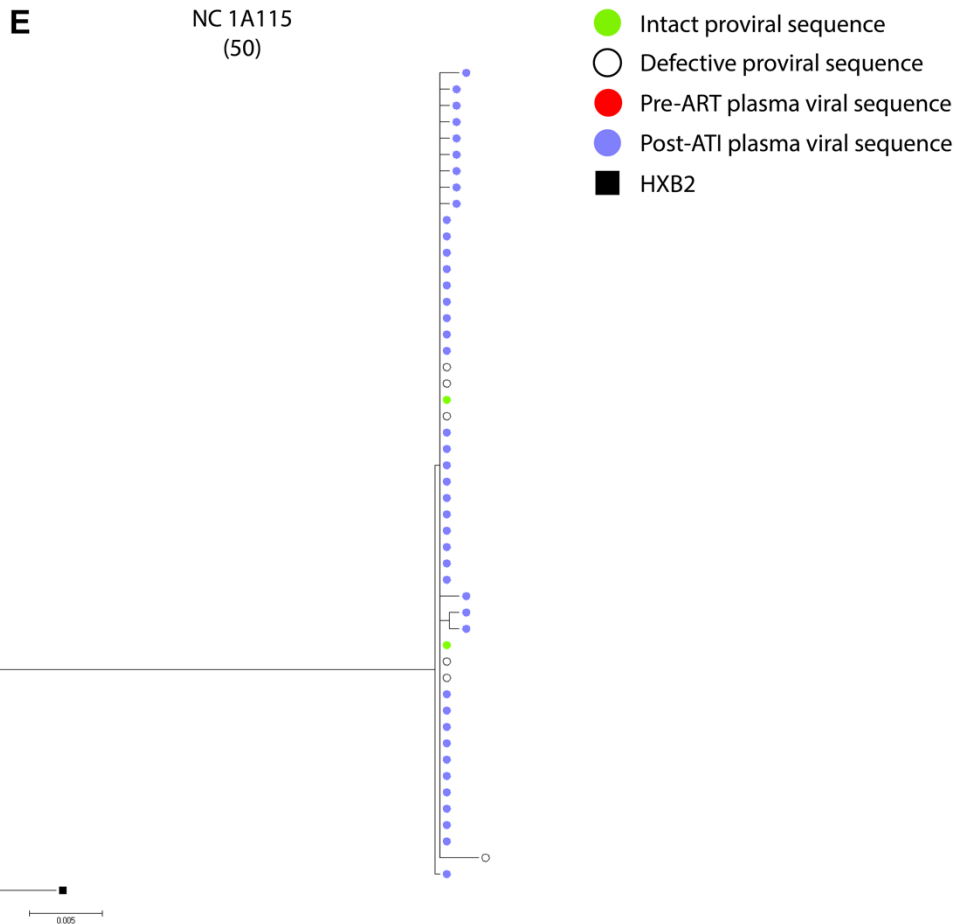

**Figure S3. Neighbor-joining trees of the *pro-rt* region in both proviral and plasma-derived sequences.** Each figure subplot depicts a phylogenetic tree of sequences obtained from one participant rooted to HXB2. Proviral sequences were obtained from PBMCs pre-treatment interruption and plasma viral sequences were obtained either pre-ART or post-ATI as indicated in the legend. Numbers in parentheses indicate absolute frequency of analyzed sequences per participant. (A-C) are PTCs and (D-E) are NCs. ART, antiretroviral therapy; ATI, analytic treatment interruption.

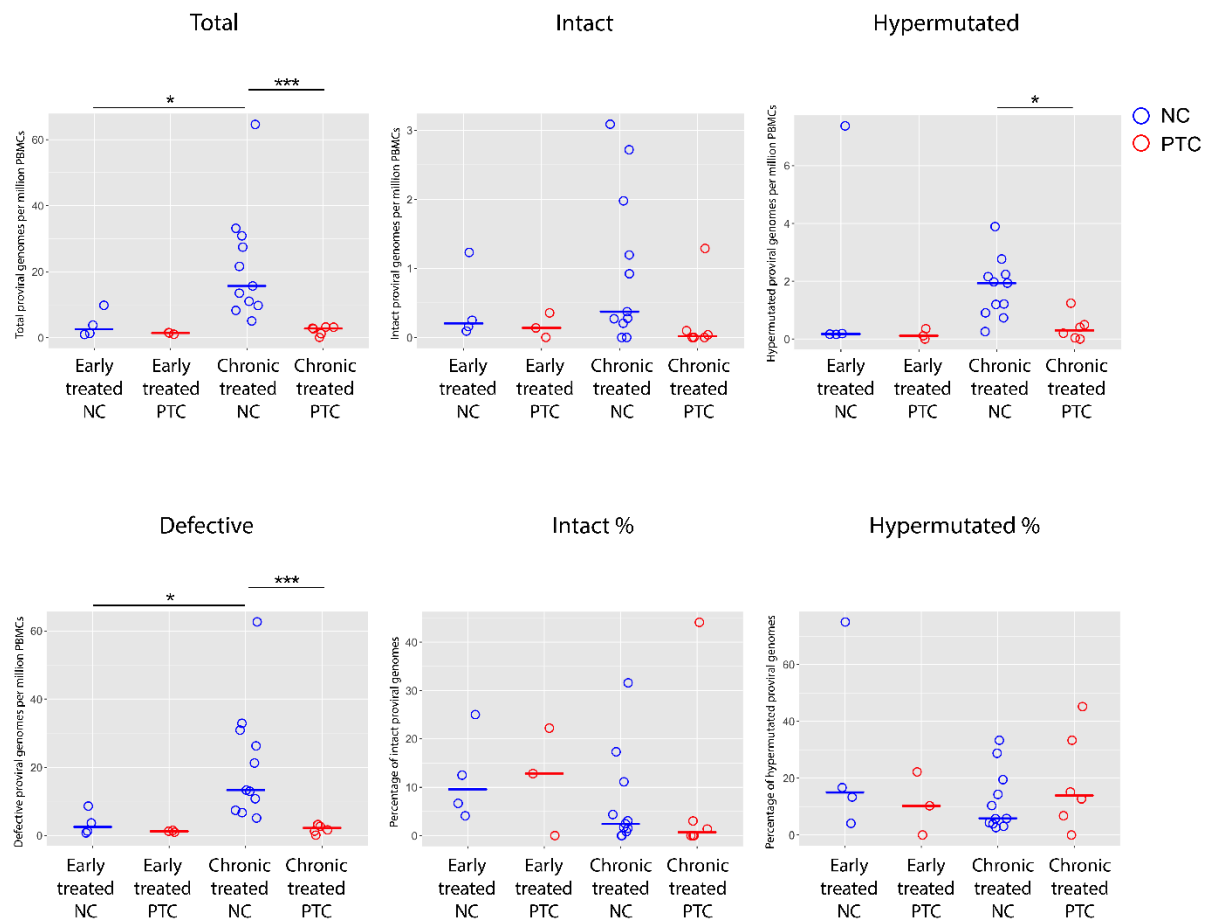

**Figure S4. Comparison of reservoir measures between early and chronic-treated participants.**

P<0.05 was considered significant and denoted as \* and P<0.001 as \*\*\*.

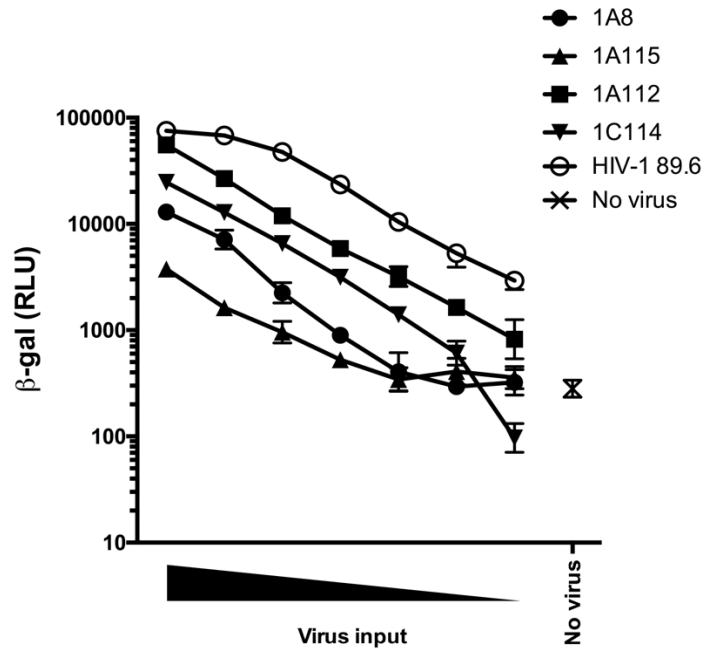

**Figure S5. Infectivity assay on TZM-bl cells.** Infectivity of recombinant virions generated using *env* PCR fragments from intact proviral genomes was tested in a TZM-bl assay. RLU, relative luminescence units.

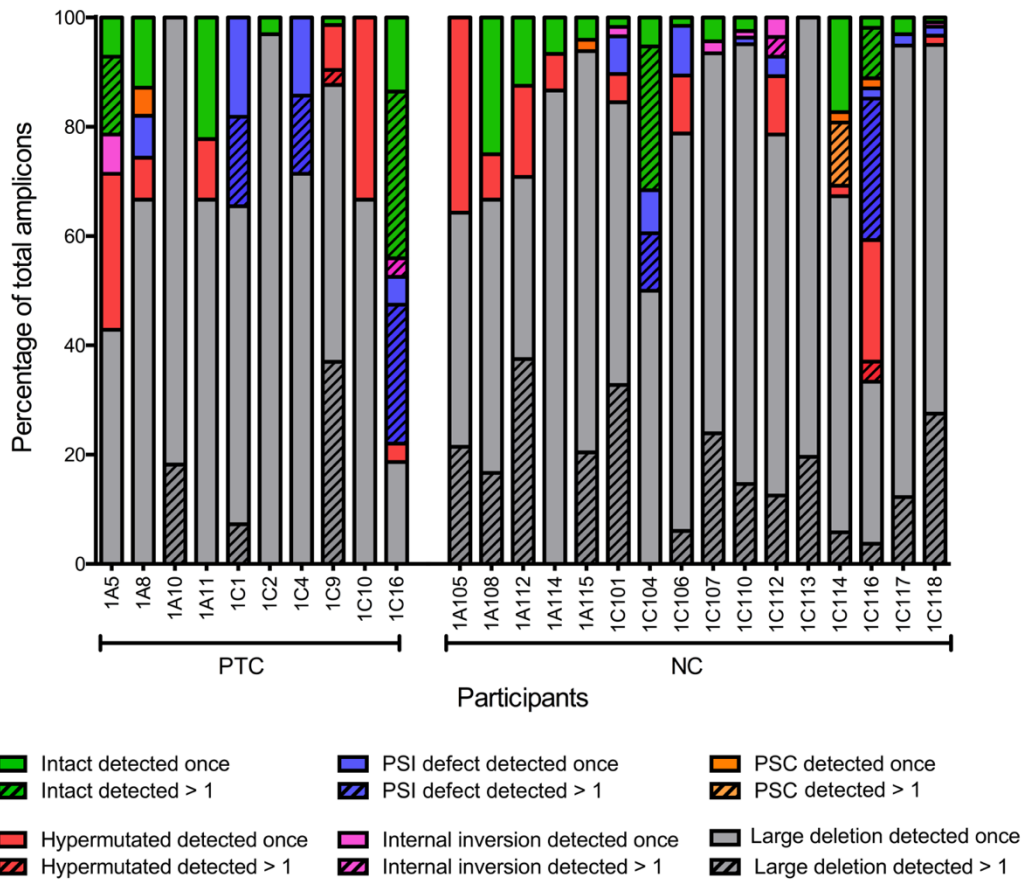

**Figure S6. Percentage of each proviral species per participant.** Solid colors represent sequences identified only once and striped bars represent identical sequences detected more than once. PSI, packaging signal; PSC, premature stop codon; PTC, post-treatment controllers; NC, post-treatment non-controllers.

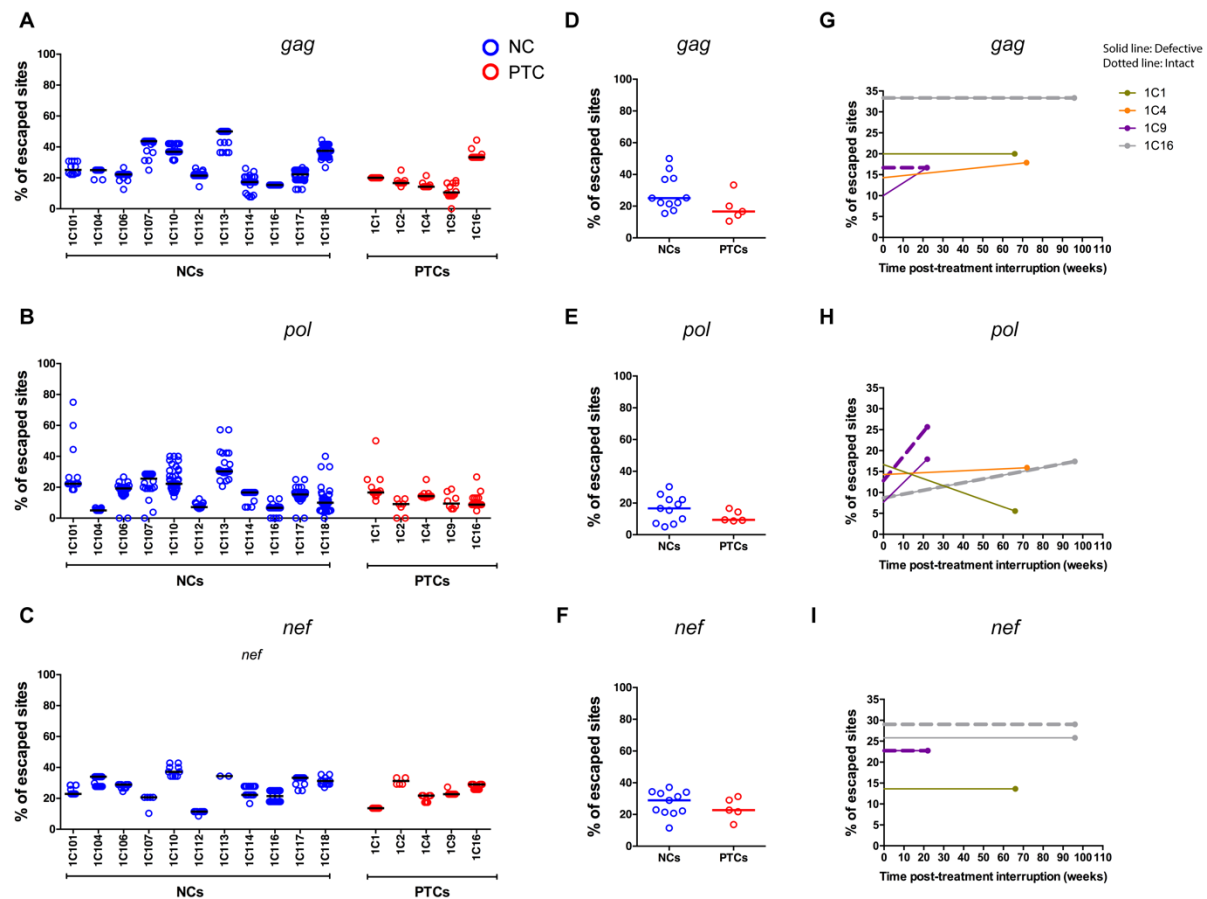

**Figure S7. Frequency of HLA-associated escape mutations.**

(A-C) Percentages of HLA-associated escaped sites within (A) *gag*, (B) *pol* and (C) *nef* are depicted for each study participant. Each data point represents one sequence. (D-F) The median percentage of escaped sites in each study participant within (D) *gag*, (E) *pol* and (F) *nef* is depicted. Each data point represents one study participant. (G-I) Longitudinal changes in the percent of HLA-escaped sites from PTCs in (G) *gag*, (H) *pol* and (I) *nef* categorized by defective (solid line) or intact (dotted line) proviruses. PTCs, post-treatment controllers; NCs, post-treatment non-controllers.

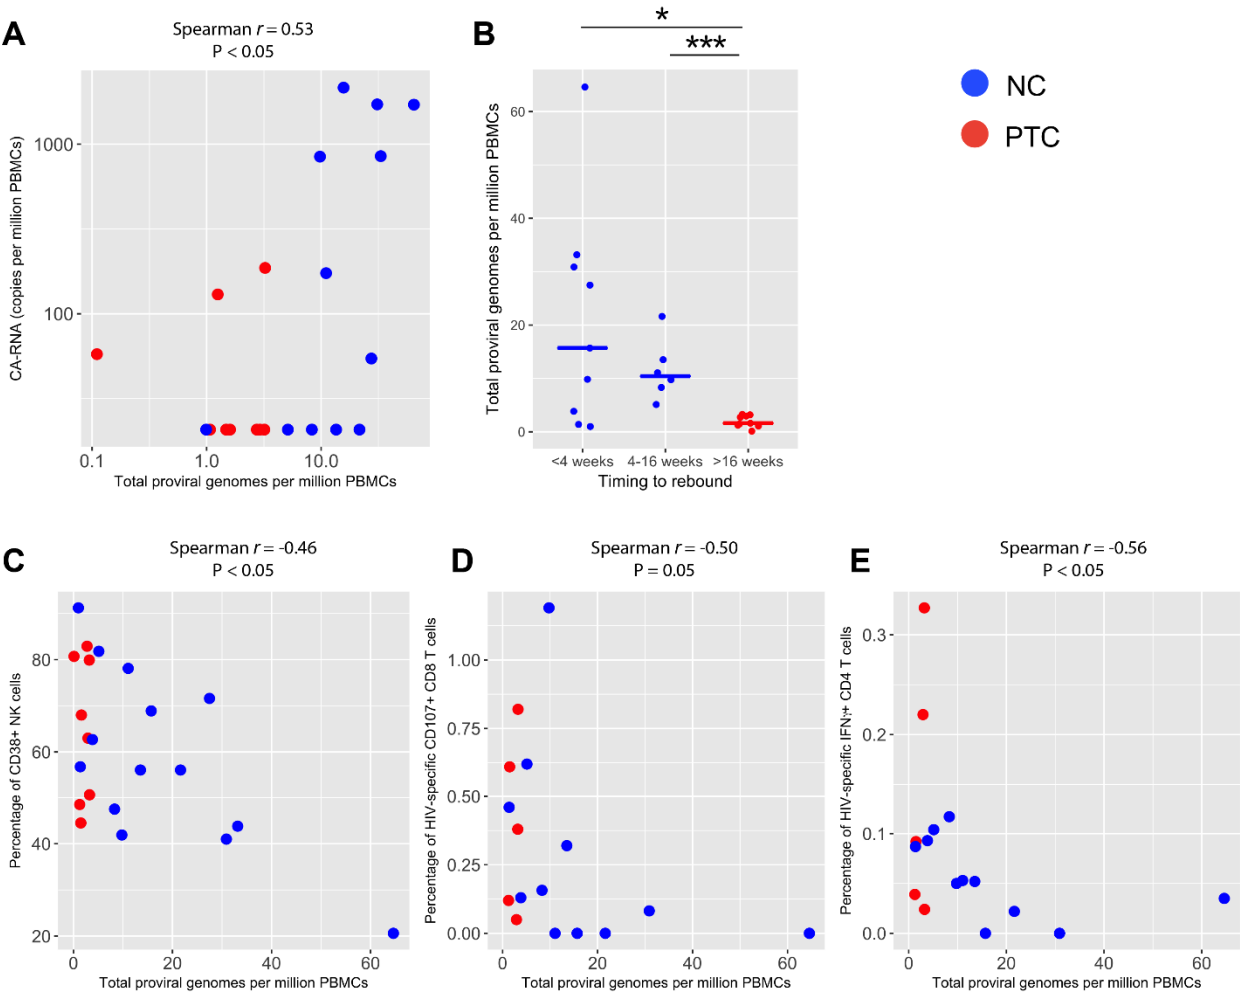

**Figure S8. Relationship between total proviral genome copy numbers and viral as well as immune markers.**

(A) Correlation between levels of cell-associated HIV RNA and copy numbers of total proviral genomes. (B) Individuals with delayed viral rebound had lower levels of total proviral genomes. Significance was calculated using a Wilcoxon rank-sum test;  $P < 0.05$  was considered significant and denoted as \* and  $P < 0.001$  as \*\*\*. (C) Correlation between percentage of CD38+ NK cells and copy numbers of total proviral genomes. (D) Correlation between percentage of HIV-specific CD107+ CD8 T cells and copy numbers of total proviral genomes. (E) Correlation between percentage of HIV-specific IFN $\gamma$ + CD4 T cells and copy numbers of total proviral genomes. NCs are depicted in blue and PTCs in red. Correlations between reservoir measures

930 were estimated with non-parametric Spearman correlation coefficients. PTC, post-treatment  
931 controllers; NC, non-controllers.

932

933

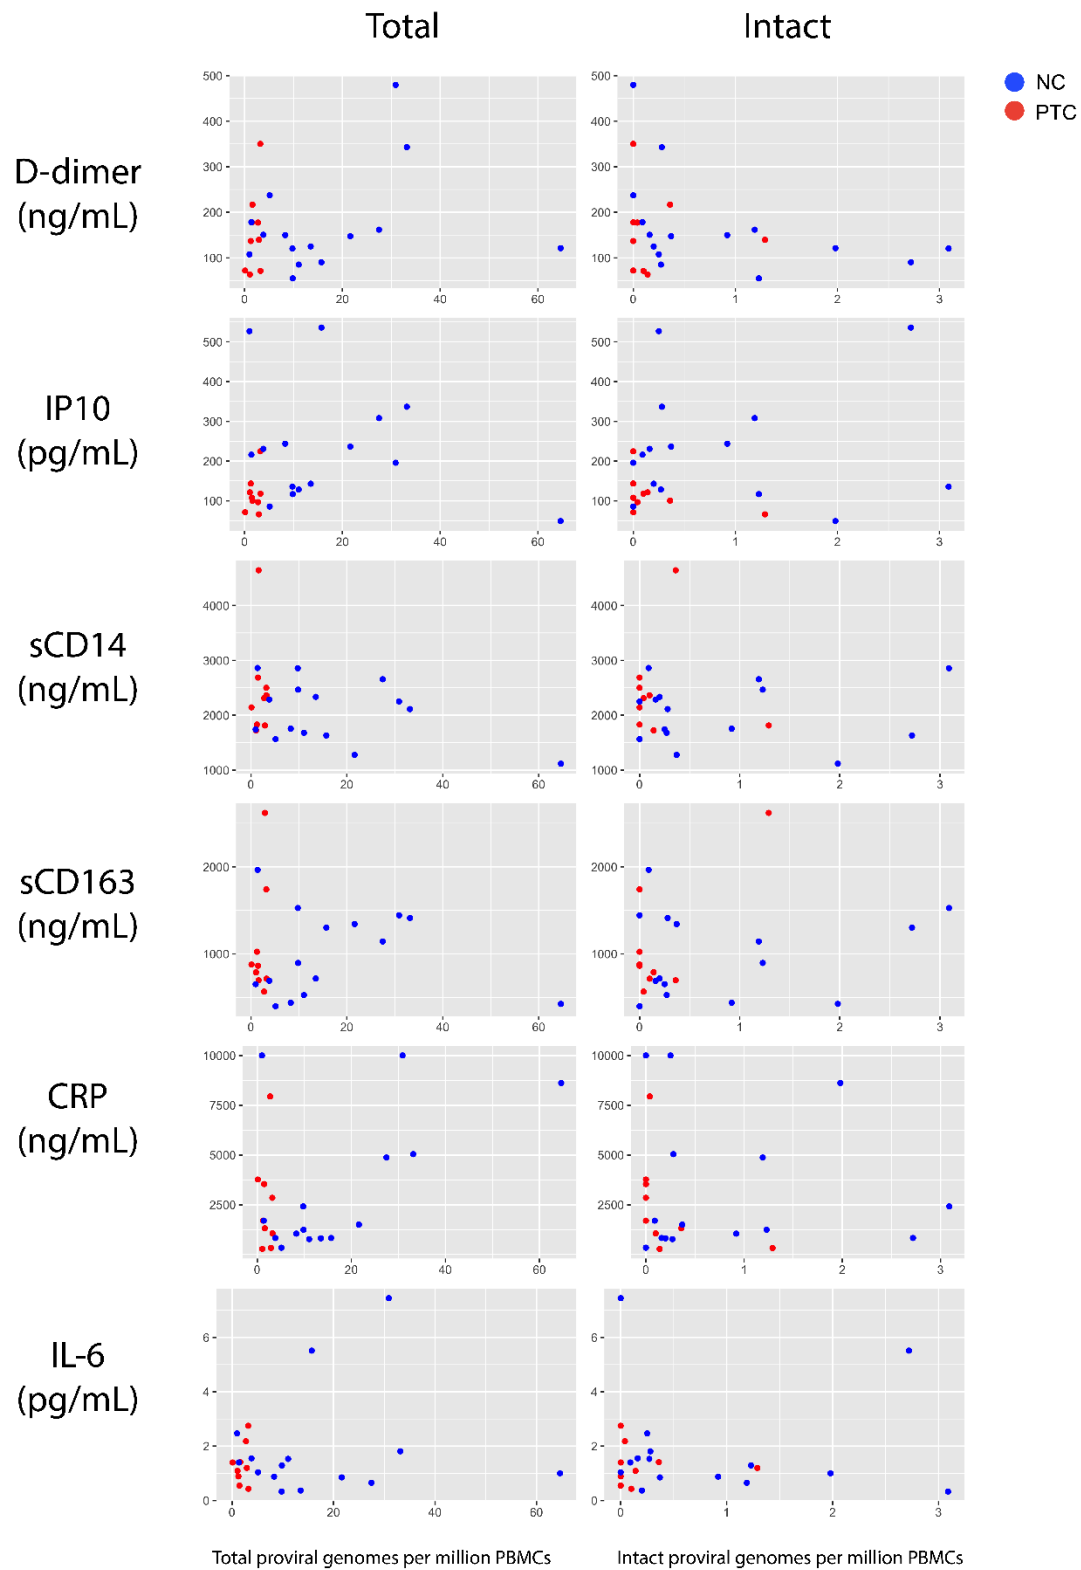

**Figure S9. No significant correlation between levels of inflammatory markers and reservoir measures.**
